# Supplementary material for: Wolbachia infection in Aedes aegypti does not affect its vectorial capacity for Dirofilaria immitis
Source: Research Square preprint supplement (doi:10.21203/rs.3.rs-4399313/v1), 2024-06-13
Supplement: Supplementary file 1 [file b6e314460cf5a18d04a6ff3c.xlsx]

## Sheet: Sheet1
Table 1. Gene Ontology enrichment analysis of DEGs between each strain by DAVID
Comparison	Category	Term	Count	%	P value	Fold Enrichment	FDR
OB > tet	GOTERM_MF_DIRECT	GO:0004867~serine-type endopeptidase inhibitor activity	3	3.33333	0.00117019	55.6226	0.0514885
OB > tet	GOTERM_CC_DIRECT	GO:0005615~extracellular space	4	4.44444	0.0038976	12.1504	0.0662592
OB < tet	GOTERM_CC_DIRECT	GO:0005622~intracellular	7	8.23529	0.00889825	3.65819	0.071186
wMel > tet	GOTERM_CC_DIRECT	GO:0005622~intracellular	5	16.6667	0.00140358	8.10027	0.00561432
wMel < tet	UP_KEYWORDS	Coiled coil	16	21.9178	0.00200864	2.38367	0.0682937
OB-wMel < OB	UP_KEYWORDS	Coiled coil	73	17.6755	6.70503e-08	1.92231	7.77784e-06
OB-wMel < OB	INTERPRO	IPR002068:Alpha crystallin/Hsp20 domain	9	2.17918	8.67157e-08	14.4002	2.54839e-05
OB-wMel < OB	INTERPRO	IPR001436:Alpha crystallin/Heat shock protein	9	2.17918	8.67157e-08	14.4002	2.54839e-05
OB-wMel < OB	INTERPRO	IPR008978:HSP20-like chaperone	10	2.42131	1.23508e-07	11.355	2.54839e-05
OB-wMel < OB	PIR_SUPERFAMILY	PIRSF036514:small heat shock protein, beta-1 type	9	2.17918	1.46729e-07	11.4968	2.49439e-06
OB-wMel < OB	UP_KEYWORDS	Disulfide bond	30	7.26392	0.000376921	2.04451	0.0218614
